# Supplementary material for: The Role of Membrane Affinity and Binding Modes in Alpha-Synuclein Regulation of Vesicle Release and Trafficking
Source: MDPI journal article supplement (doi:10.3390/biom12121816), 2022-12-05
Supplement: s1 [file s1]

**A**

Anti-alpha-synuclein antibody fluorescence intensity (A.U.)

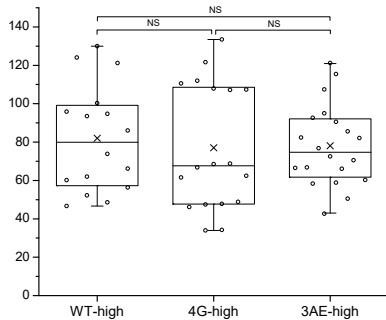**B**

Anti-alpha-synuclein antibody fluorescence intensity (A.U.)

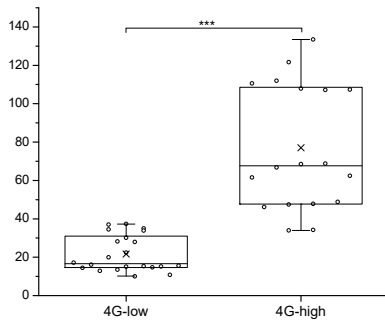**Figure S11**
