# Supplementary figures and images for: The Role of Membrane Affinity and Binding Modes in Alpha-Synuclein Regulation of Vesicle Release and Trafficking
Source: MDPI journal article supplement (doi:10.3390/biom12121816), 2022-12-05

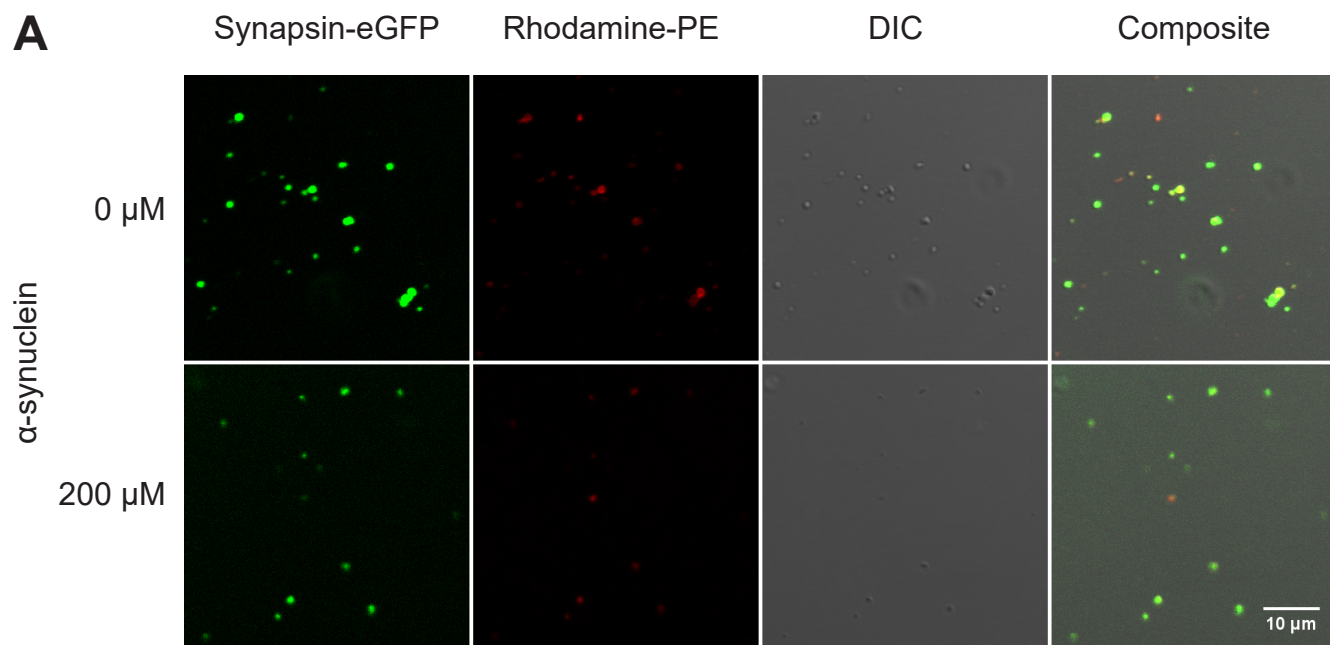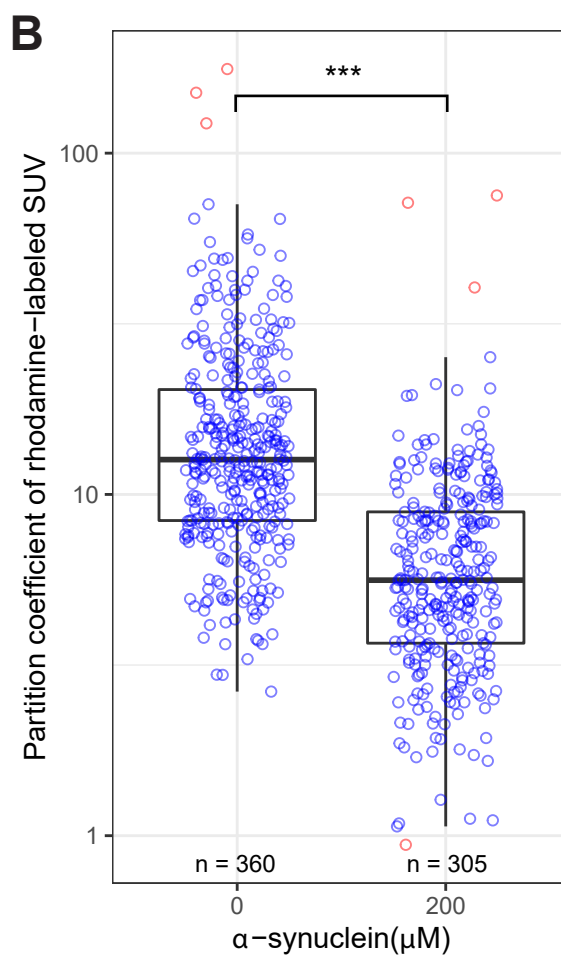

**Figure S5**

Supplement: s1 [file s1]

**A**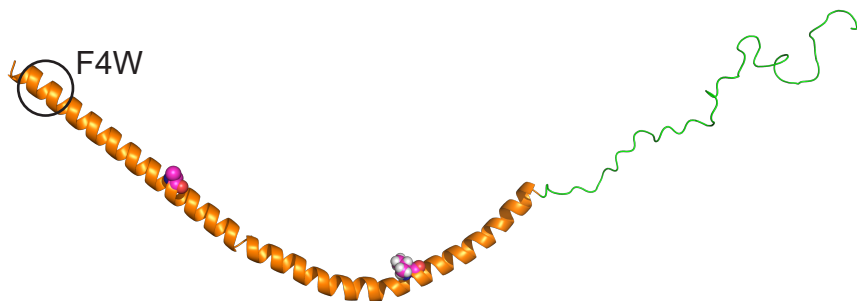**B**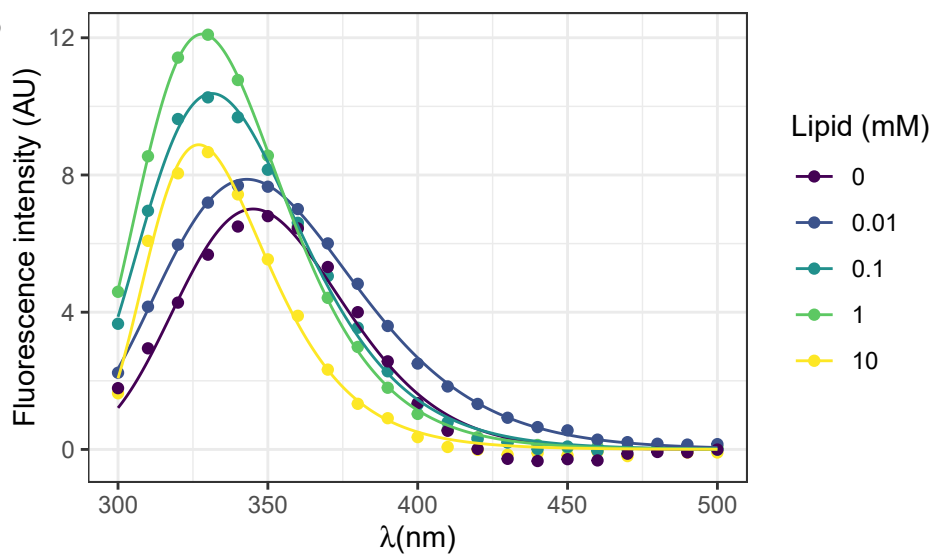**C**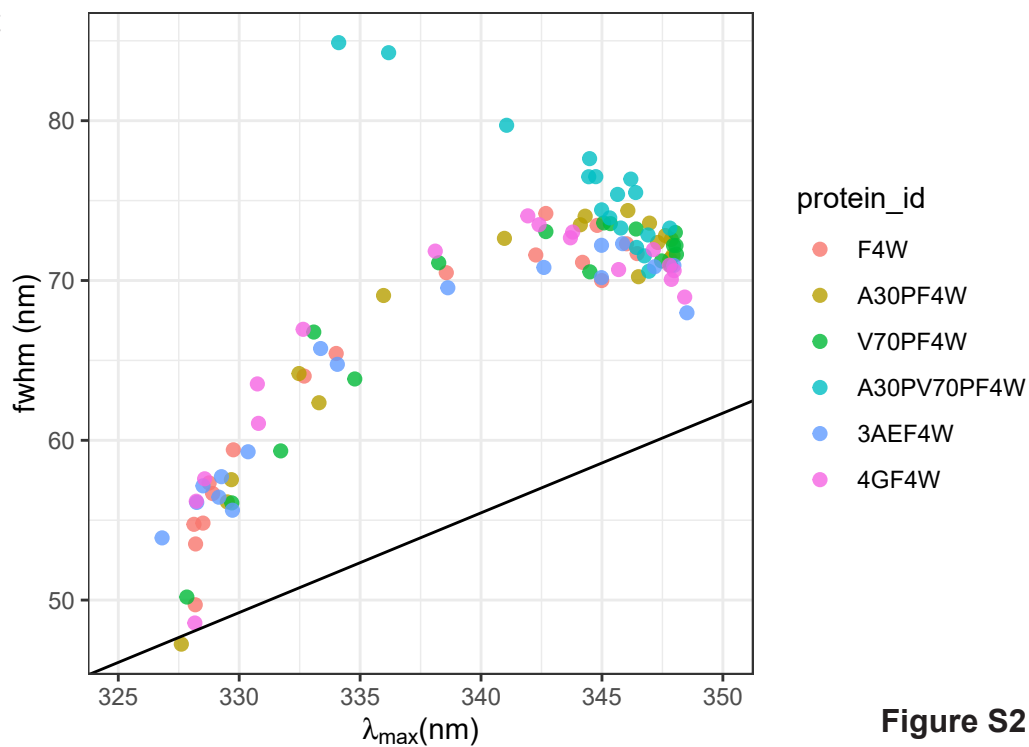**Figure S2**

Supplement: s1 [file s1]

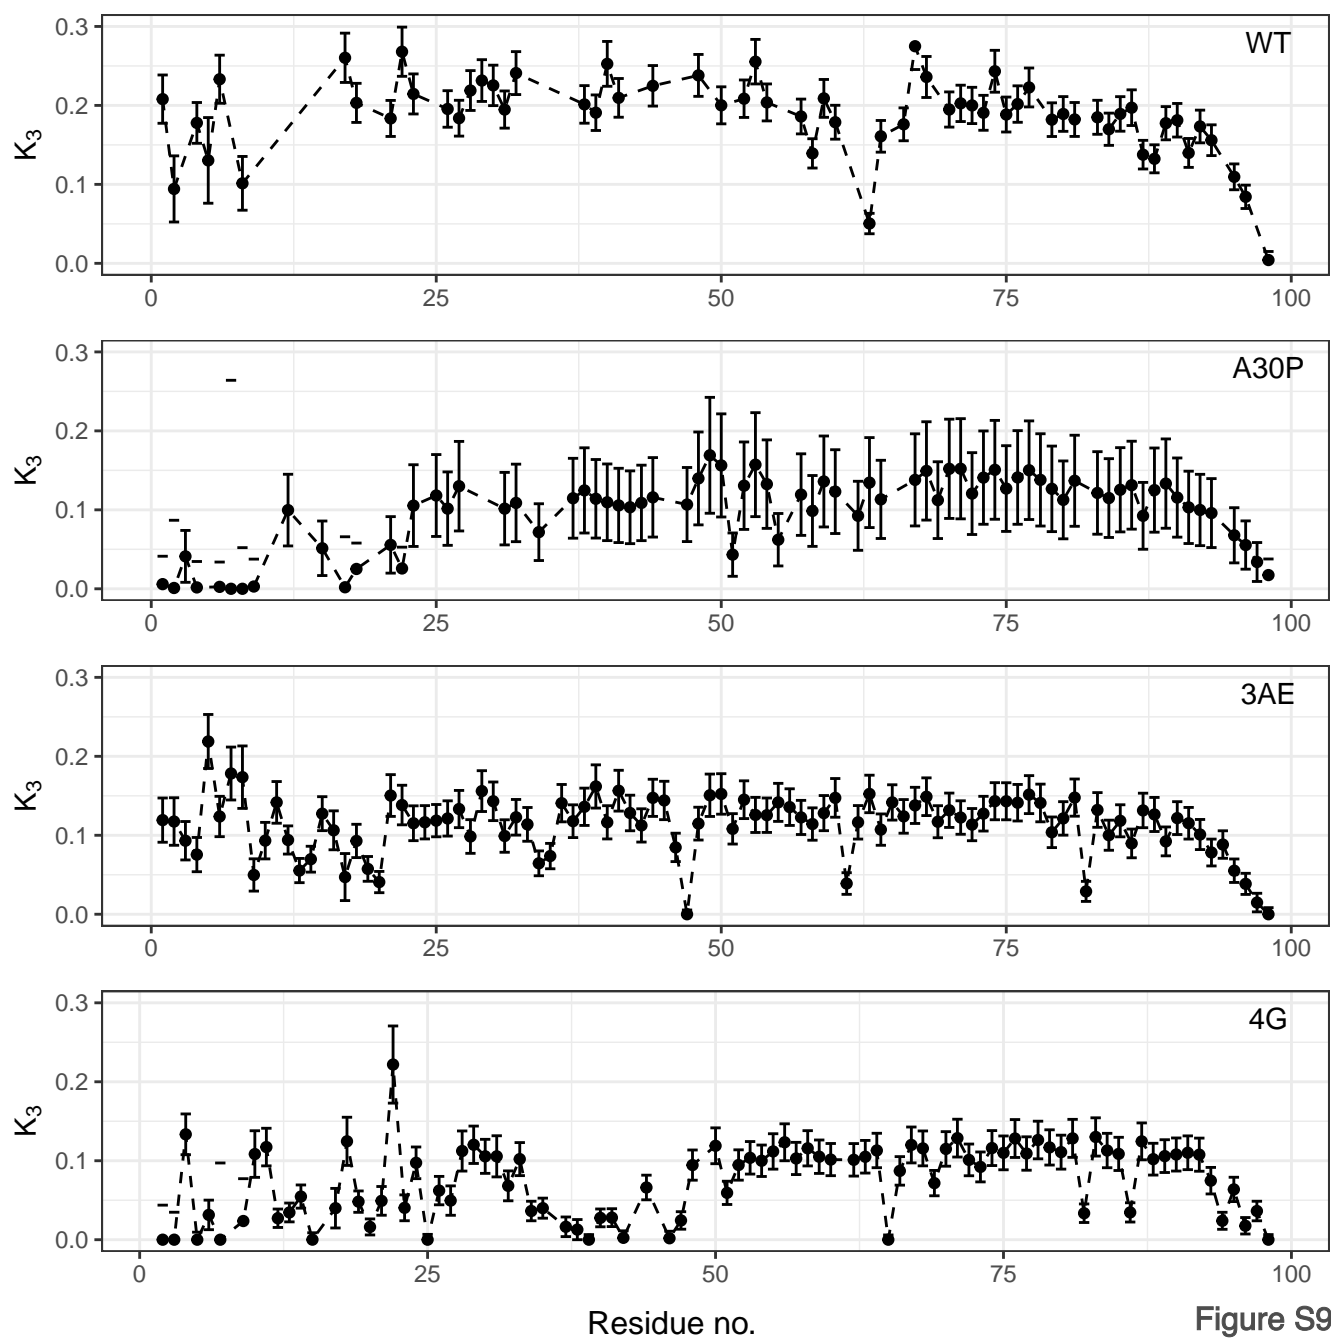

Figure S9

Supplement: s1 [file s1]

Peak height ratio

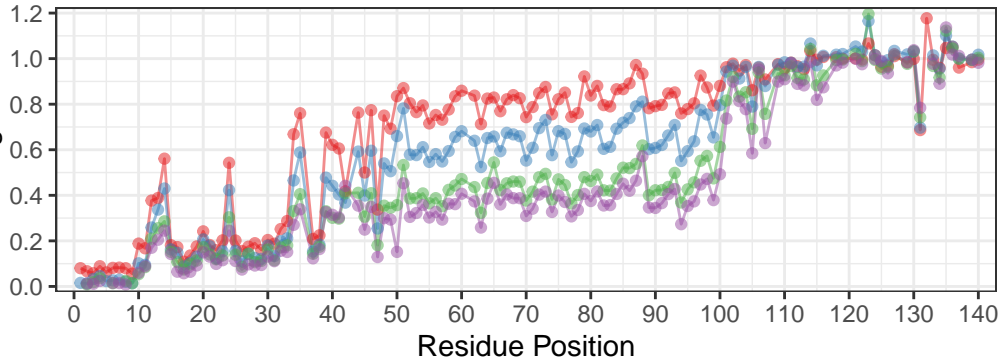

Lipid (mM)

- 2.5
- 5
- 10
- 15

Figure S6

Supplement: s1 [file s1]

**A**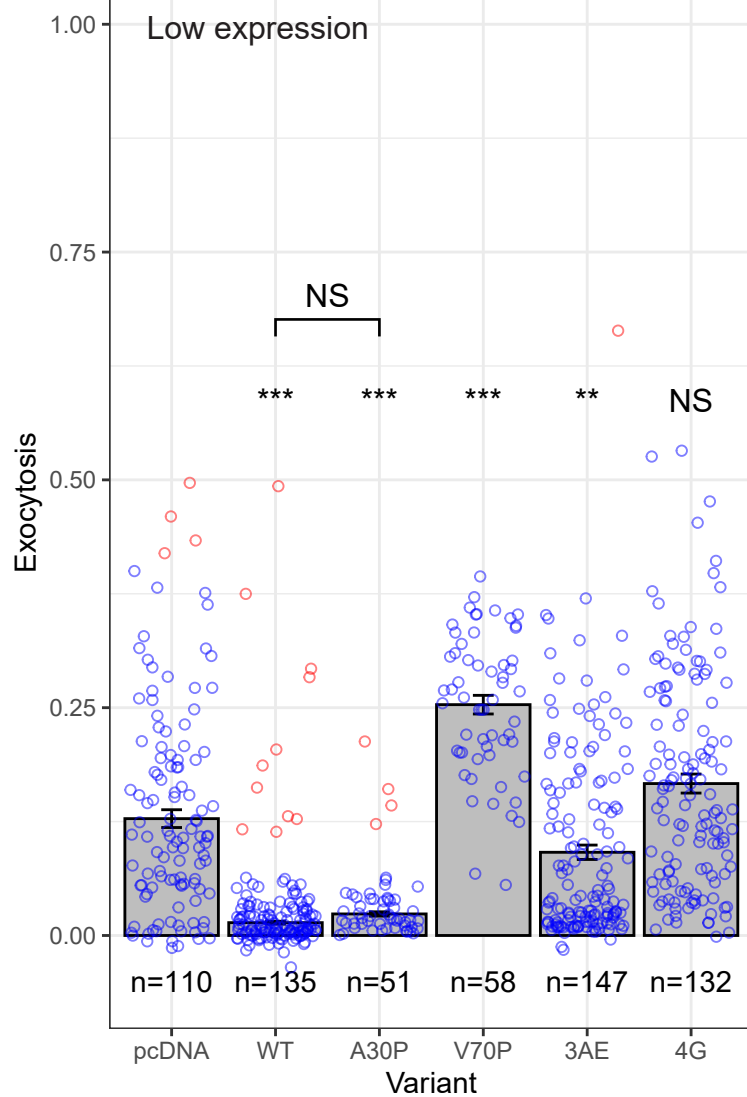**B**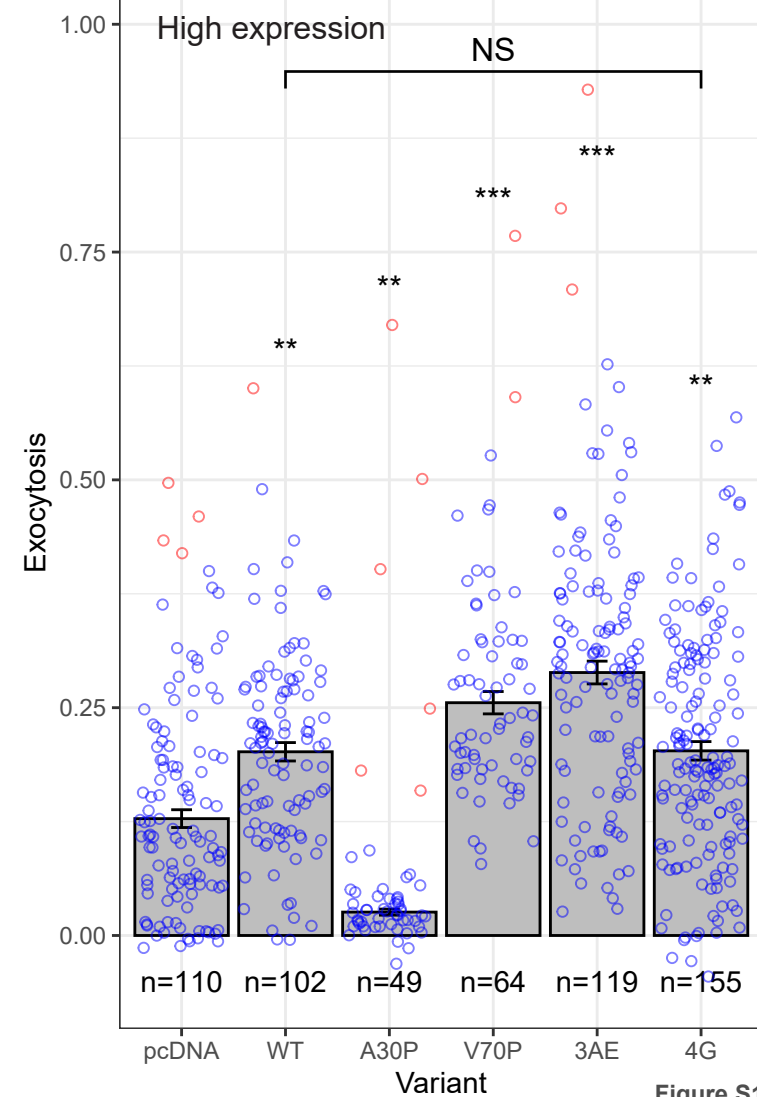**Figure S1**

Supplement: s1 [file s1]

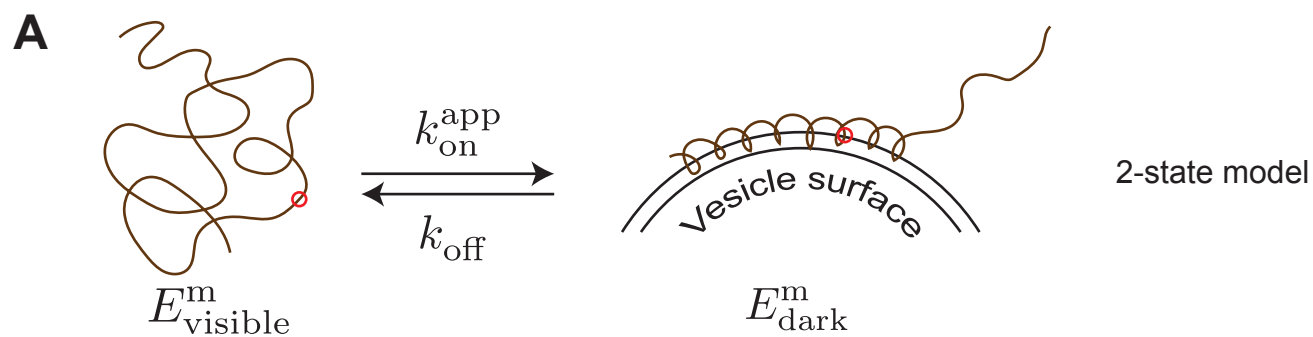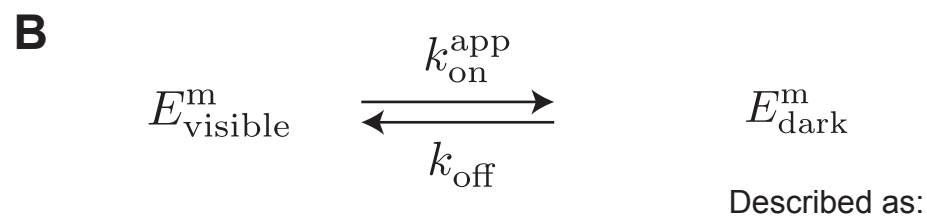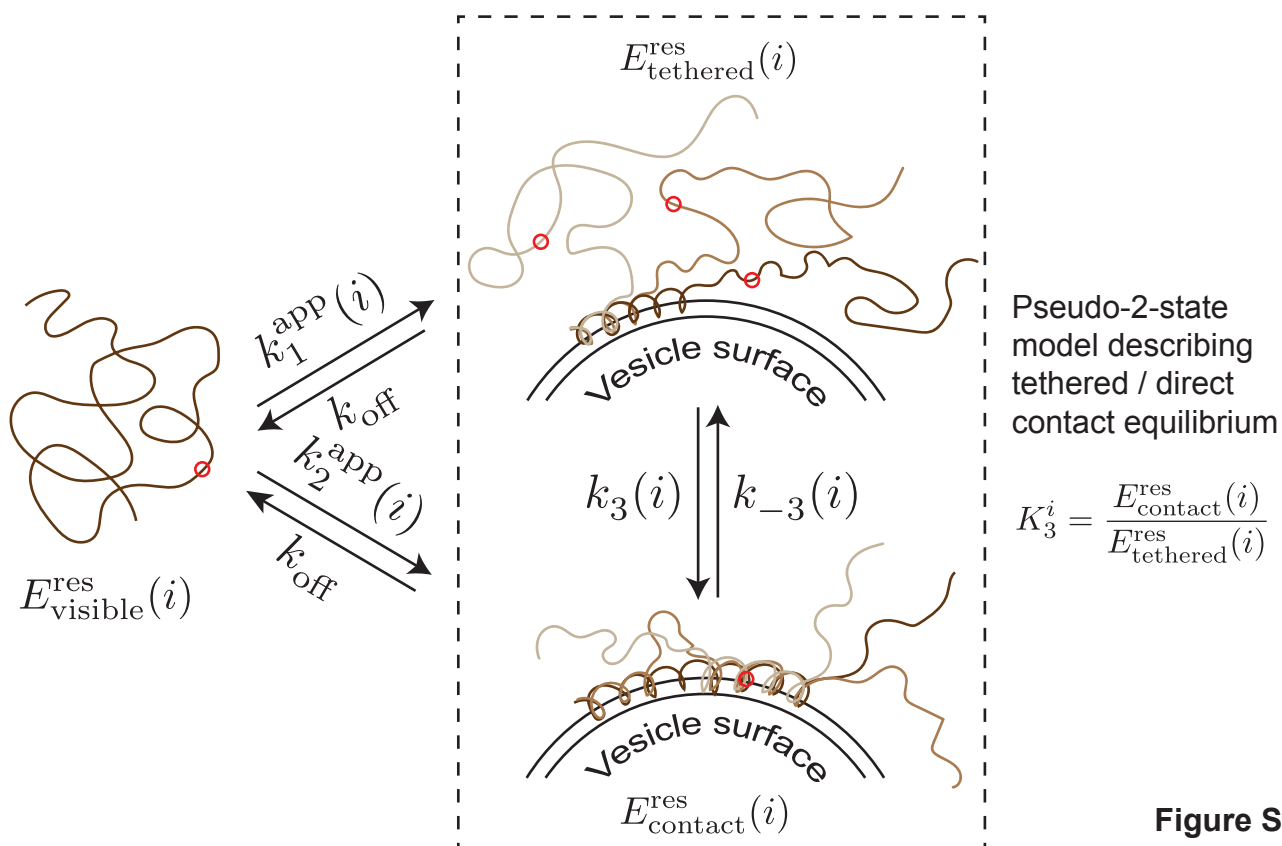

**Figure S10**

Supplement: s1 [file s1]

**A**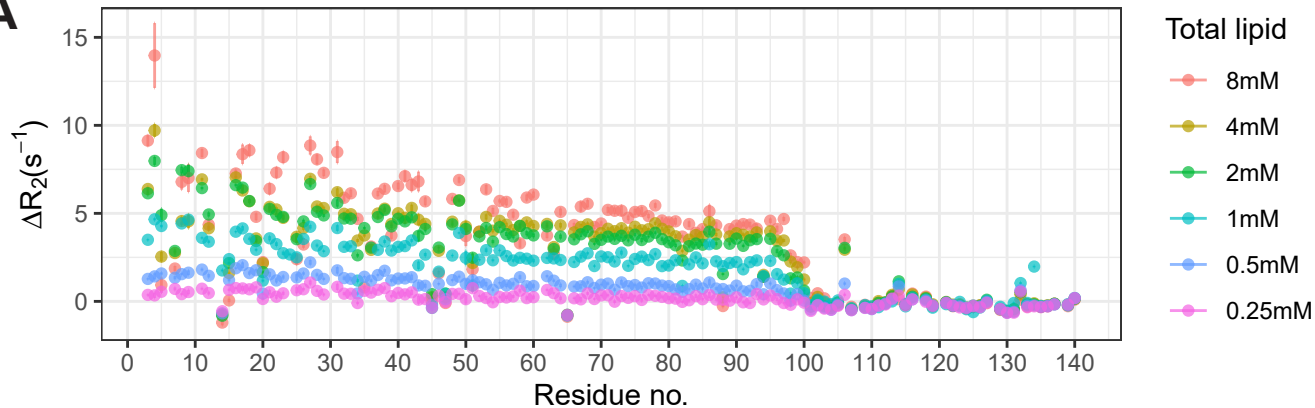**B**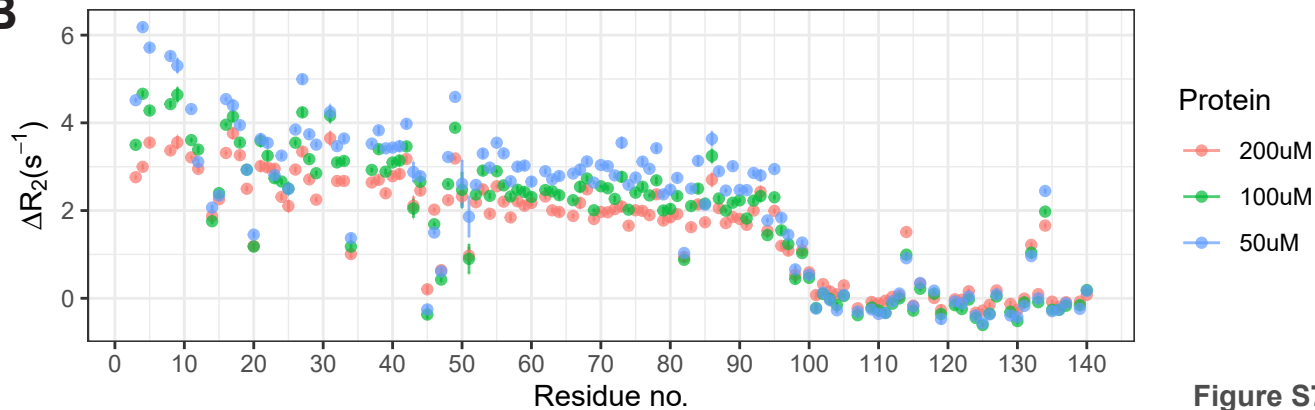**Figure S7**

Supplement: s1 [file s1]

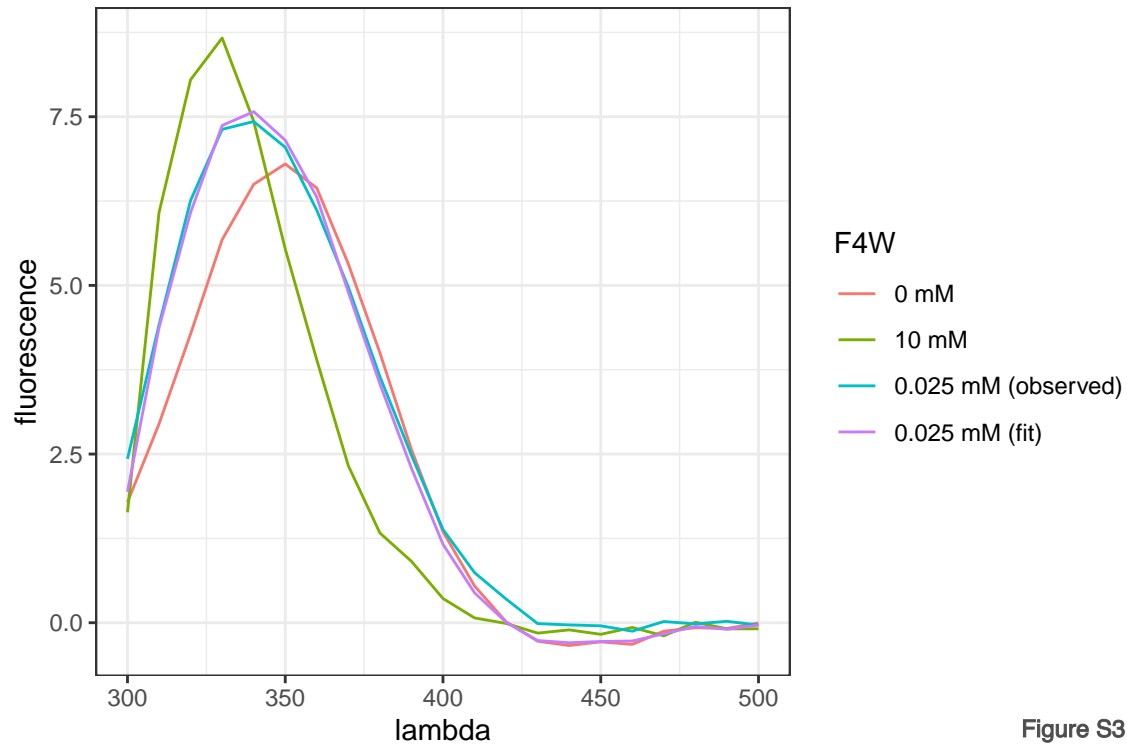

Figure S3

Supplement: s1 [file s1]

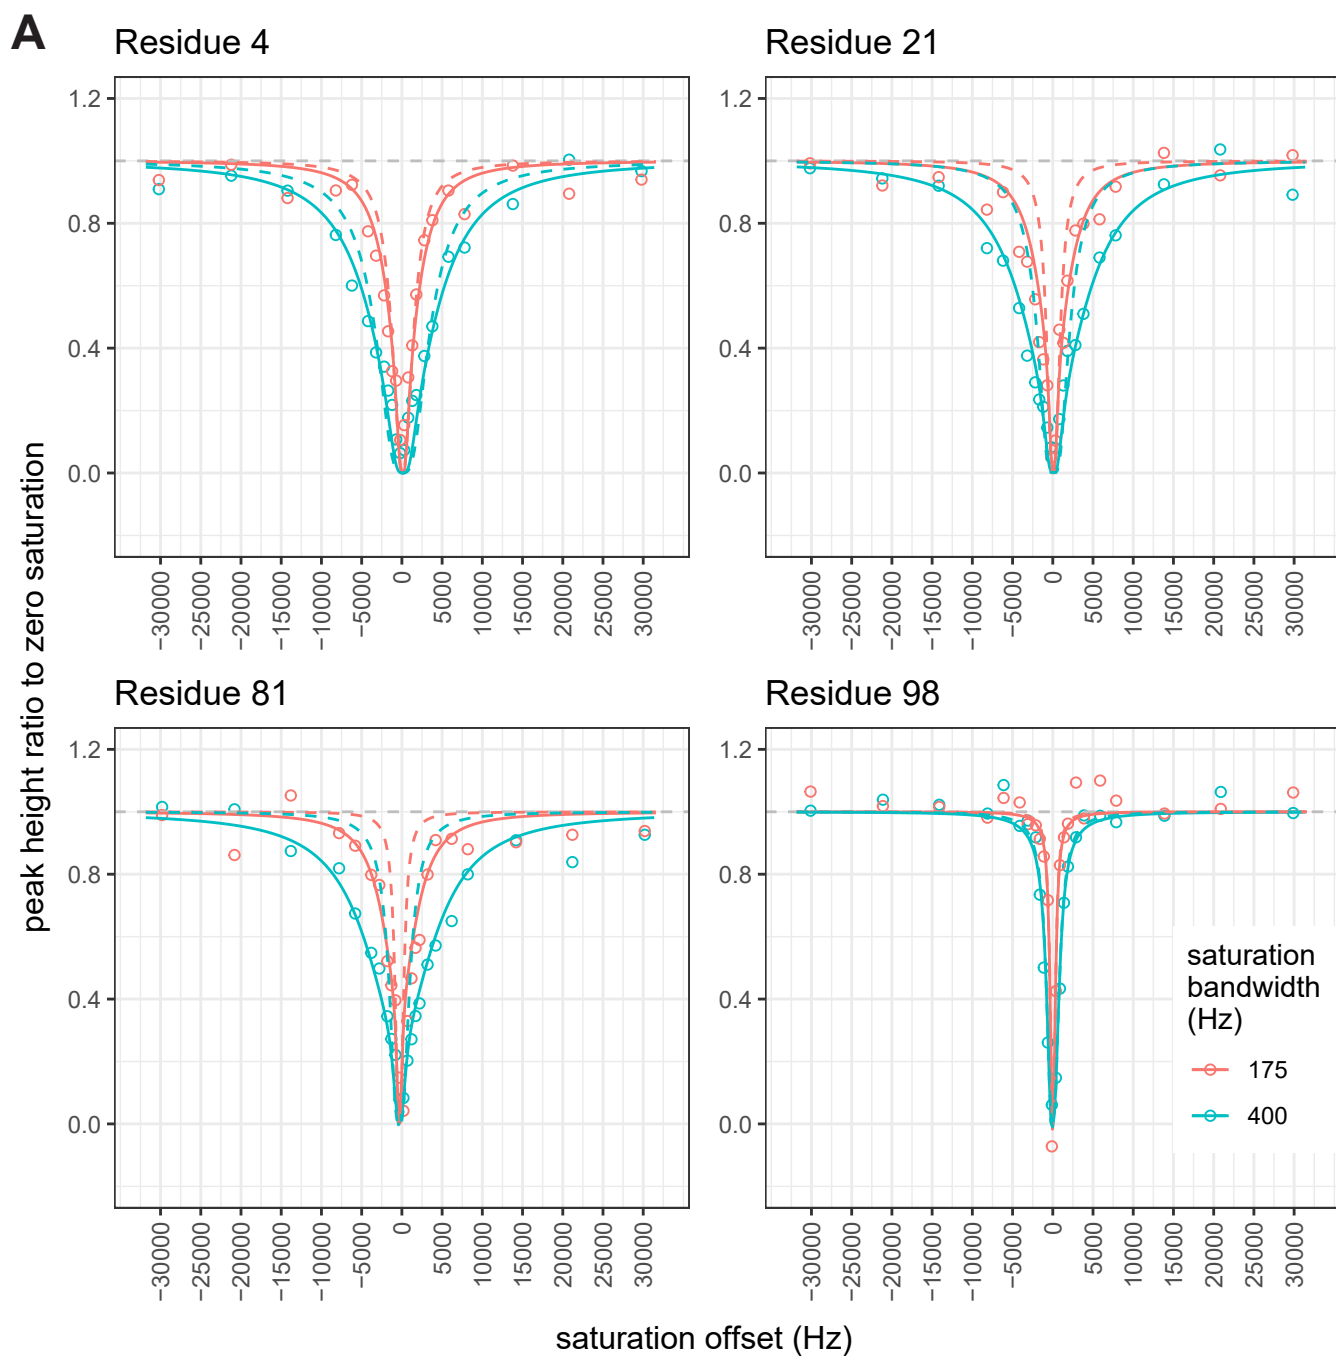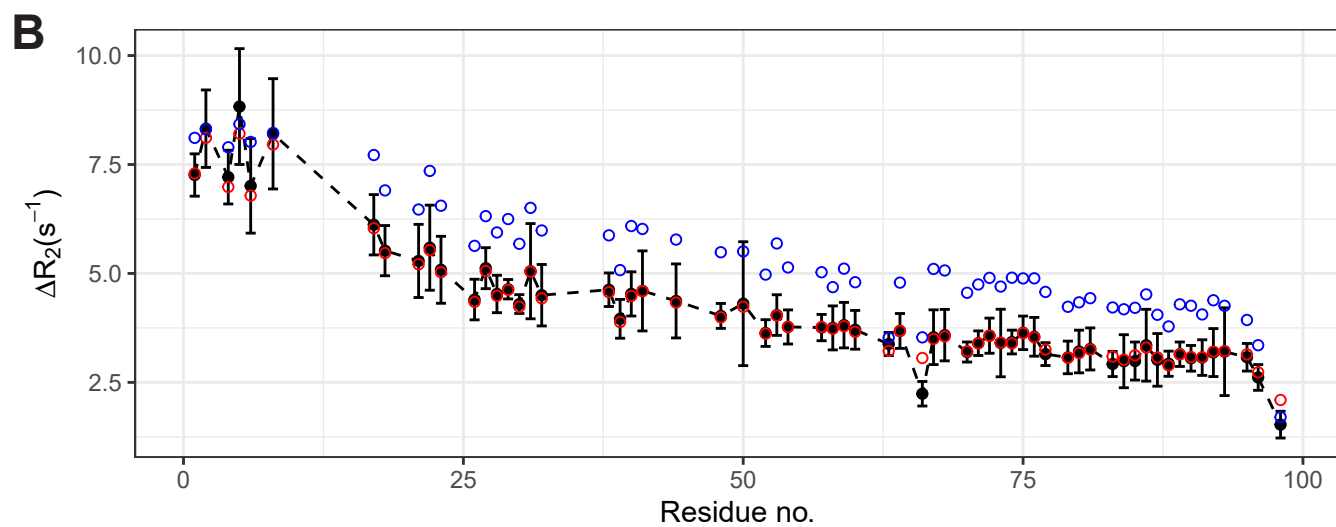

Figure S8

Supplement: s1 [file s1]

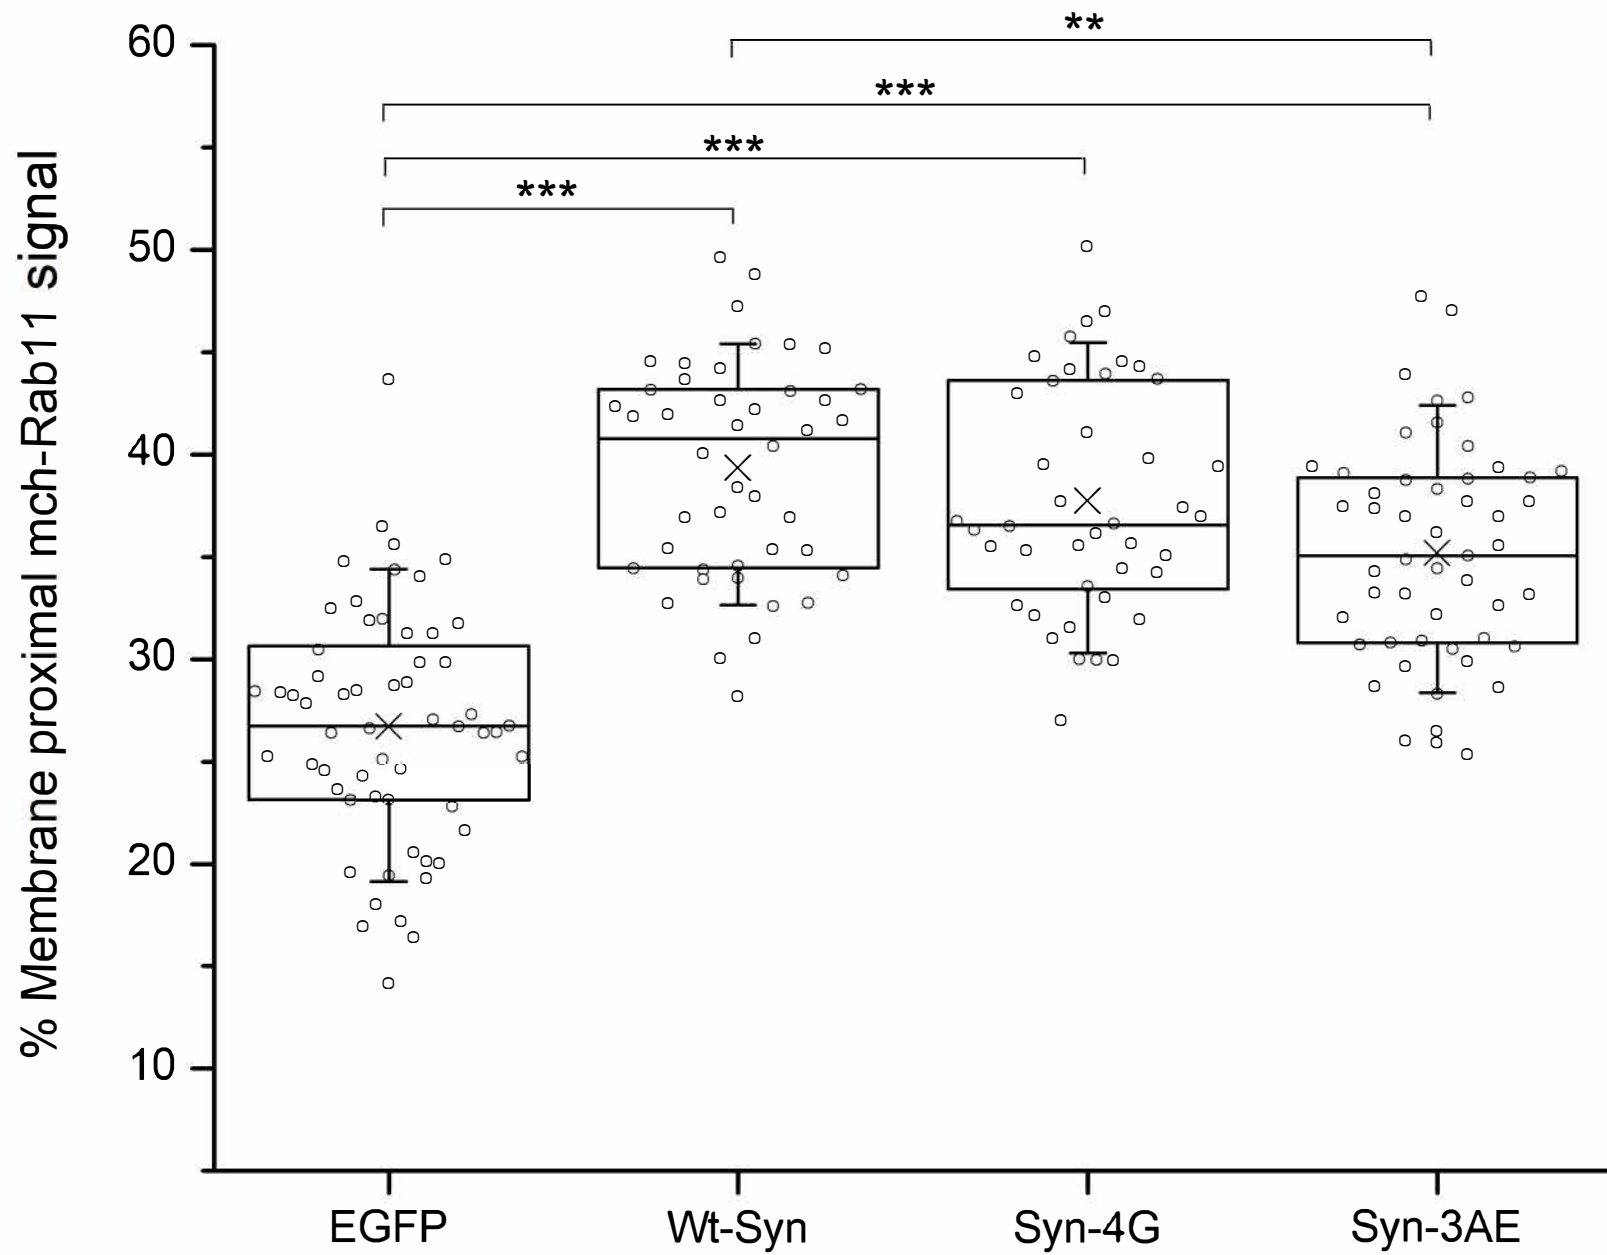

**Figure S4**

Supplement: s1 [file s1]
